# Supplementary material for: WITHDRAWN: Dual-protein orthogonal exosome sorting and polymerization-mediated miRNA profiling for the diagnosis of gliomas
Source: Research Square preprint supplement (doi:10.21203/rs.3.rs-4106372/v1), 2025-11-18
Supplement: Supplementary file 1 [file 0ba046362ddc2eacd7647347.docx]

**Supporting Information for:**

**Dual-protein orthogonal exosome sorting and polymerization-mediated miRNA profiling for the diagnosis of gliomas**

Xingjie Wua,b,c,#,*, Zhilu Suna,d,#, Ling Taob,c, Xiangchun Shenb,c,* and Guofeng Wua,*

*aDepartment of Emergency,* *The Affiliated Hospital of Guizhou Medical University, Guiyang, 550004, Guizhou, China*

bState Key Laboratory of Functions and Applications of Medicinal Plants, School of Pharmaceutical Sciences, Guizhou Medical University, No.6 Ankang Avenue, Guiyang City and Guian New District, 561113, Guizhou, China

cThe High Efficacy Application of Natural Medicinal Resources Engineering Center of Guizhou Province, School of Pharmaceutical Sciences, Guizhou Medical University, No.6 Ankang Avenue, Guiyang City and Guian New District, 561113, Guizhou, China

*dDepartment of Emergency, The First Affiliated Hospital of Hengyang Medical School,* *University of South China, No. 69 Chuanshan Road, Shigu District, Hengyang City, 421001, Hunan, China*


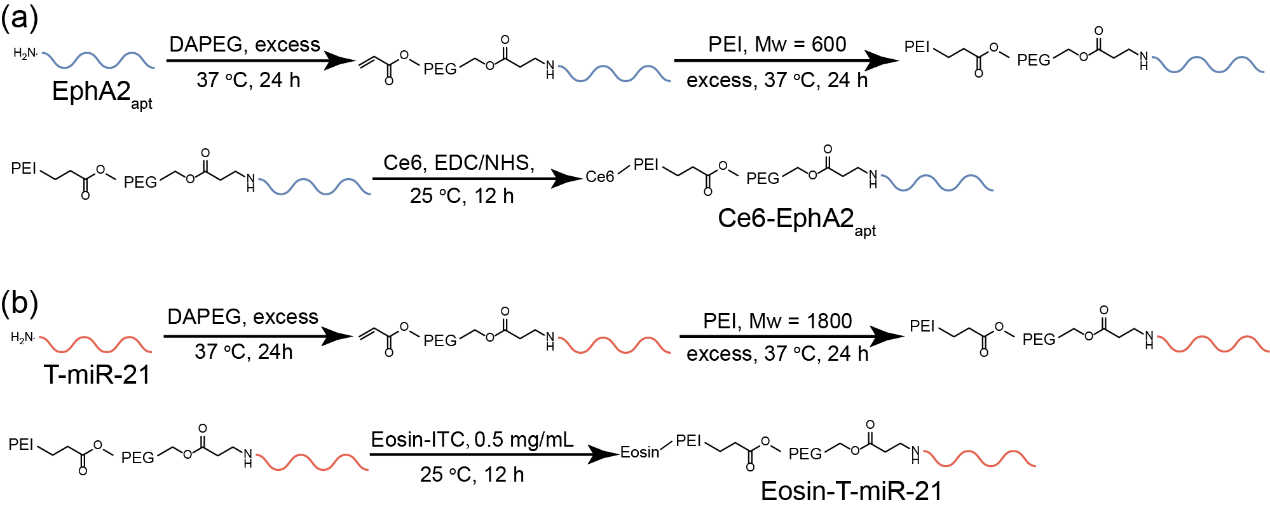


**Fig. S1.** The schematic illustration of aptamer oligo (a) and transducing oligo (b) modification processes.

**Table S1.** The list of complementary and transducing oligos of glioma-related miRNAs used in this manuscript.

| Oligo ID | Sequence (5` to 3`) |
| --- | --- |
| C-miR-9 | TCATACAGCTAGATAACCAAAG |
| T-miR-9 | TCTTTGGTTATC |
| C-miR-21 | TGTCAGACAGCCCATCGACTGG |
| T-miR-21 | CCAGTCGATGGG |
| C-miR-24 | CTGTTCCTGCTGAACTGAGCCA |
| T-miR-24 | CTGTTCCTGCTG |
| C-miR-125b | TCACAAGTTAGGGTCTCAGGGA |
| T-miR-125b | TCC TGAGACCC |
| C-miR-221 | GAGAACATGTTTCCAGGTAGCC |
| T-miR-221 | GGCTACCTGGAA |
| C-miR-301a | CCTGCTTTCAGATGCTTTGACA |
| T-miR-301a | TTGTCAAAGCAT |



**Fig. S2.** (a) Schematic illustration of MNP surface modification process. (b) the TEM image of MNP-EGFRapt. (c) the surface zeta potential of MNP before and after surface modification.


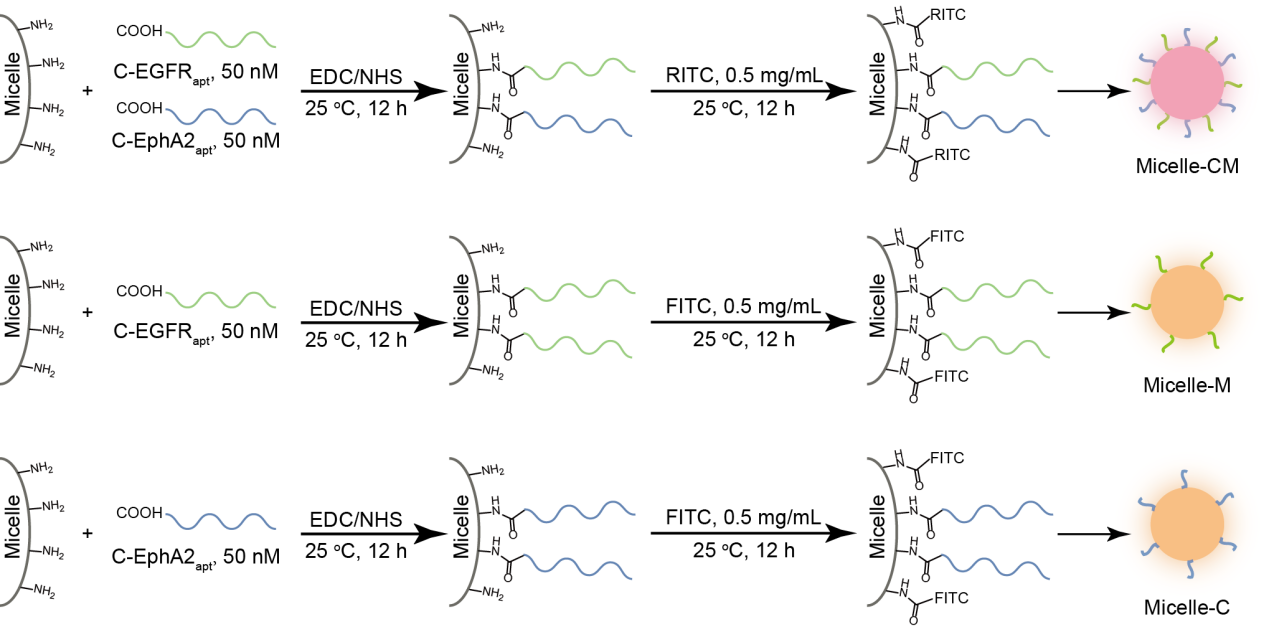
**Fig. S3.** Schematic illustration of PLGA-b-PEI micelle surface modification processes.





**Fig. S4.** The relative 1,3-diphenylisobenzofuran (DPBF) absorbance of micelle solution with different irradiation time after double labeling and magnetic separation.


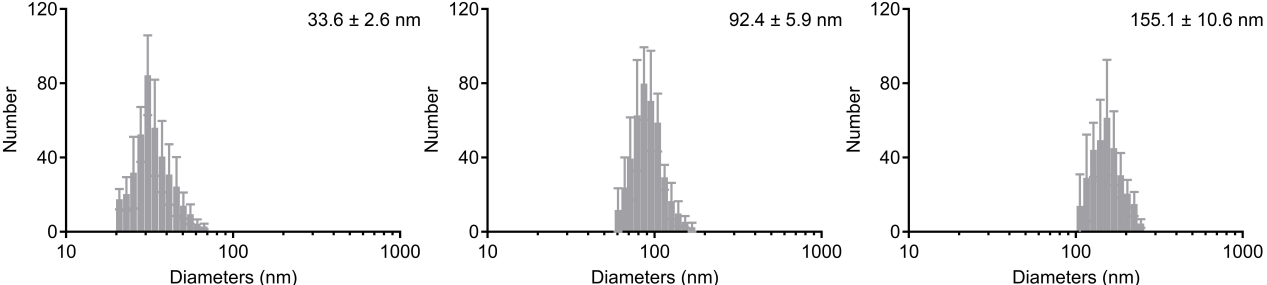


**Fig. S5.** The hydration diameters of micelles prepared from PLGA-b-PEI having different hydrophilic ratio.





**Fig. S6.** The glioma-related miRNA composition of EGFR+, EphA2+ and CD133+ exosome subtypes isolated of glioma patient plasma and healthy dornor plasma. ΔF was normalized within each raw.





**Fig. S7.** The ROC curves of individual glioma-related miRNAs encapsulated within EGFR+/EphA2+ (a), EGFR+/CD133+ (b) and EphA2+/CD133+ (c) exosome subtypes on the classification of glioma and non-glioma patients. The AUC values of each miRNA were indicated at the top of each Fig..
